# Supplementary material for: Convergent use of phosphatidic acid for hepatitis C virus and SARS-CoV-2 replication organelle formation
Source: PubMed Central journal article supplement (PMC8671429; doi:10.1038/s41467-021-27511-1), 2021-12-14

# Supplementary Information

## Convergent use of phosphatidic acid for Hepatitis C virus and SARS-CoV-2 replication organelle formation

Keisuke Tabata\*, Vibhu Prasad\*, David Paul, Ji-Young Lee, Minh-Tu Pham, Woan-Ing Twu, Christopher J. Neufeldt, Mirko Cortese, Berati Cerikan, Yannick Stahl, Sebastian Joecks, Cong Si Tran, Christian Lüchtenborg, Philip V'kovski, Katrin Hörmann, André C. Müller, Carolin Zitzmann, Uta Haselmann, Jürgen Beneke, Lars Kaderali, Holger Erfle, Volker Thiel, Volker Lohmann, Giulio Superti-Furga, Britta Brügger, and Ralf Bartenschlager &

\* These authors contributed equally to this work

& Correspondence to: ralf.bartenschlager@med.uni-heidelberg.de

### This PDF file includes:

Supplementary Figs. 1 to 10  
Supplementary Tables 1 to 5  
References  
Source Blots

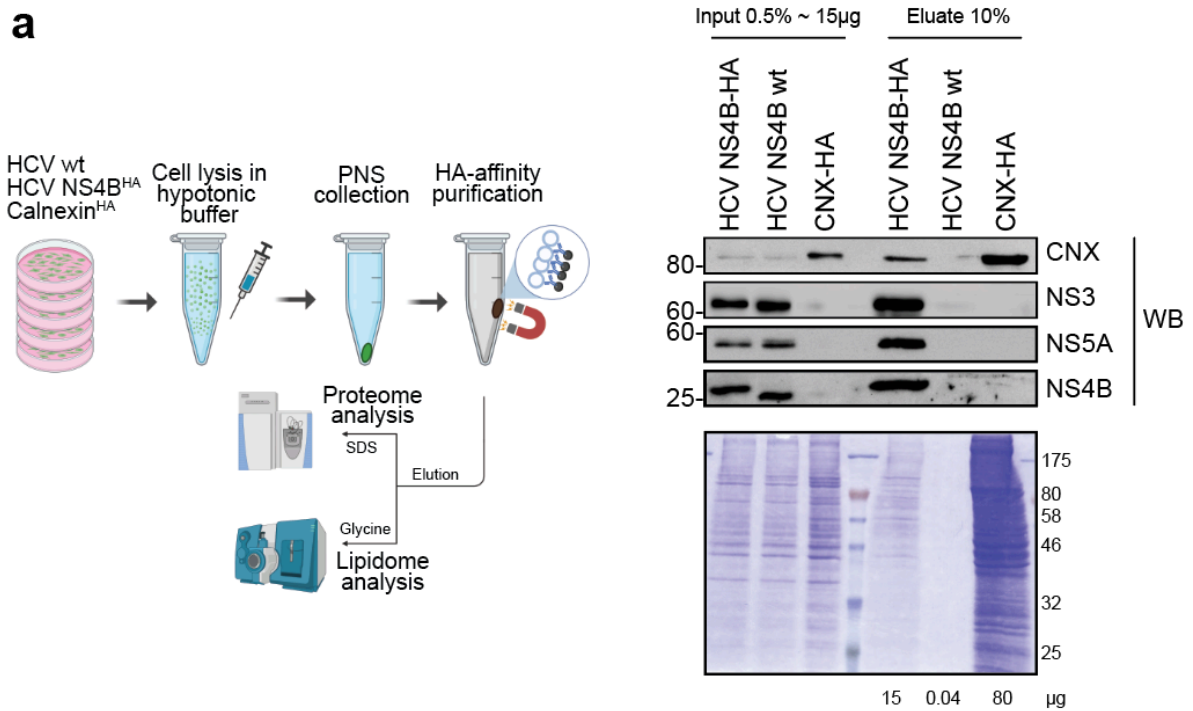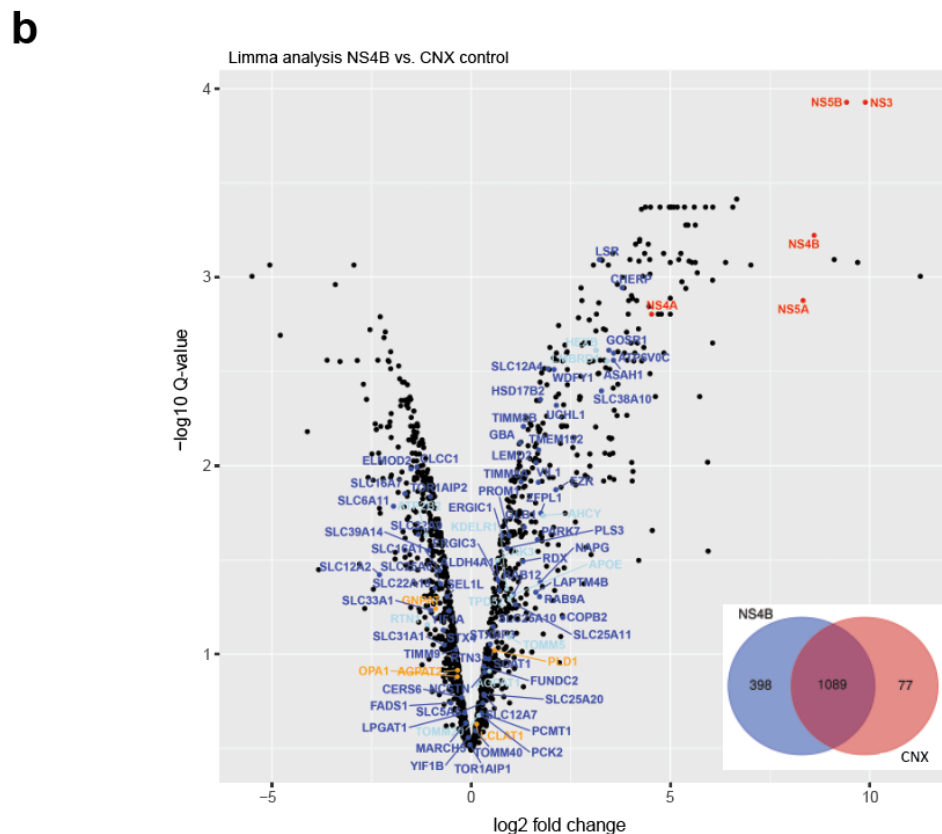

**Supplementary Figure 1. Purification and proteome of NS4B-associated membranes.** **a** NS4B-associated DMV fractions were isolated from Huh7-Lunet cells containing a stable subgenomic HCV replicon of the isolate JFH1. This replicon encoded either wildtype or an HA-tagged NS4B (NS4B-wt and NS4B-HA, respectively). Huh7-Lunet cells stably expressing HA-tagged calnexin (CNX-HA) were used as biological reference. Cell lysates generated by hypotonic lysis were centrifuged and post-

nuclear supernatants (PNS) were applied to affinity purification using magnetic beads coated with an HA-specific antibody. After extensive washing of lysate-loaded beads, captured complexes were eluted with SDS (for proteome analysis) or glycine [pH 2.5] (for lipidome analysis). Given amounts of cell lysate (input) and eluate were analyzed by western blotting (top panel) and Coomassie blue staining (bottom panel). Numbers on the bottom right refer to total protein yield in the given fractions (in  $\mu\text{g}$ ). Molecular weight markers (in kDa) are indicated on the left of the Western blot and on the right of the Coomassie blue stained gel. Samples of all three conditions were prepared in duplicates and analyzed by LC-MS/MS based proteomics. **b** Volcano plot of differentially enriched interactors of NS4B and CNX. The q-value was calculated using the limma R software package<sup>1</sup> and corrected for multiple hypothesis testing. Proteins selected for validation are highlighted by dark blue, proteins confirmed by siRNA screen in orange and virus proteins in red color.

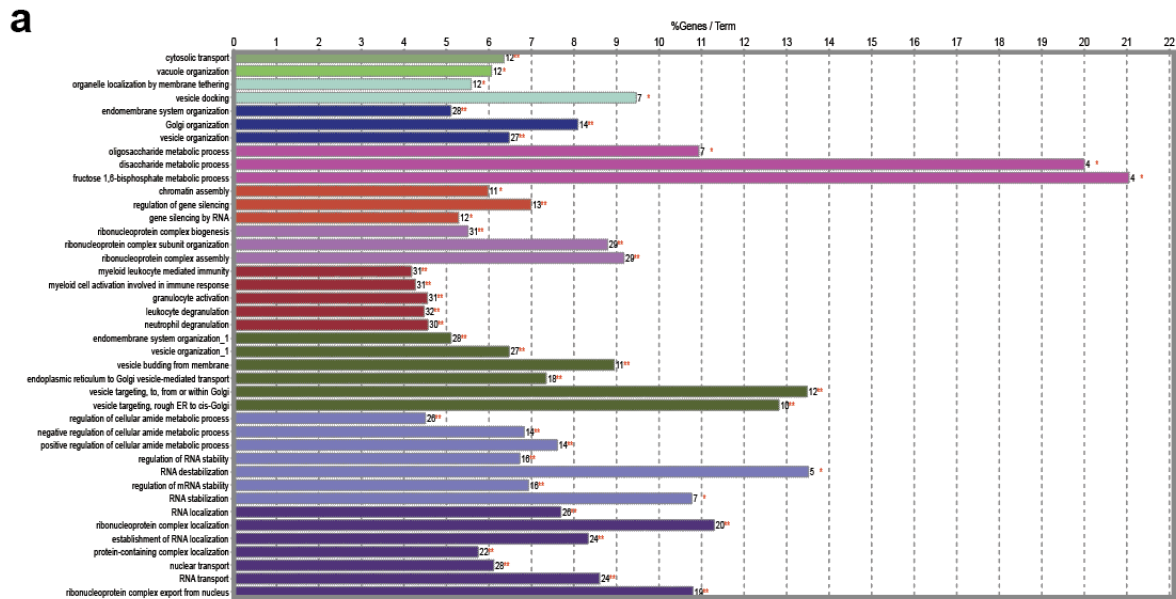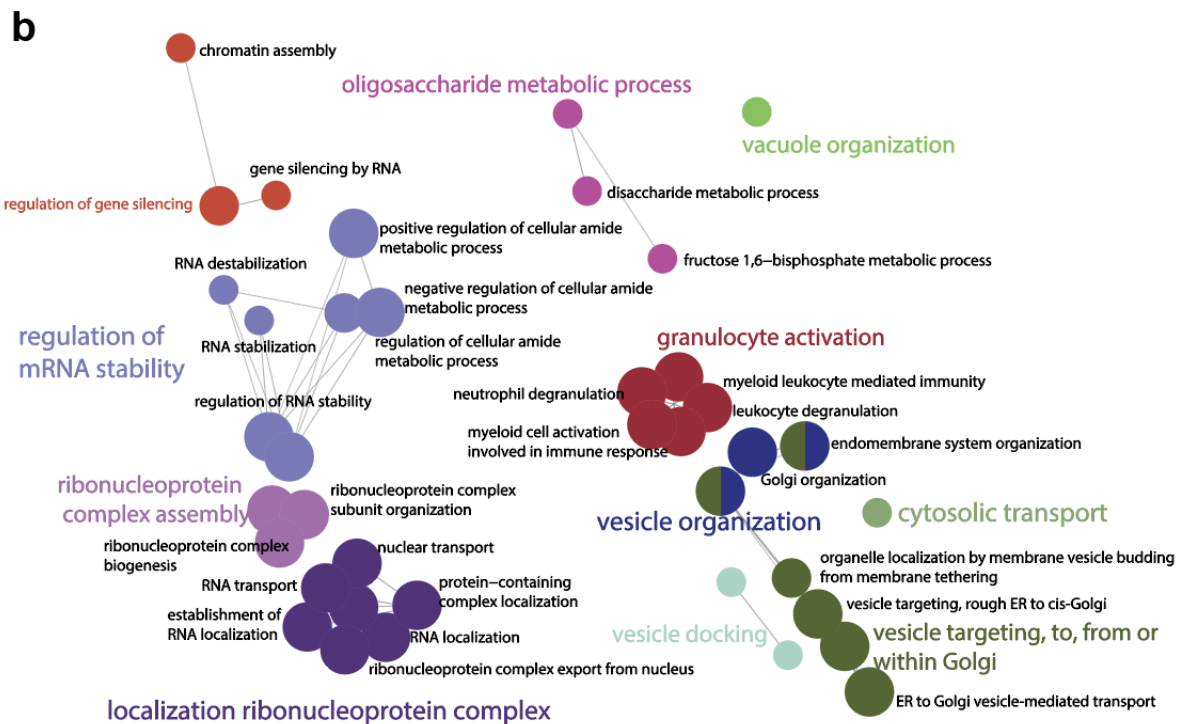

**Supplementary Figure 2. Gene ontology analysis of proteome hits identified in NS4B-enriched membrane fractions.** List of 309 proteins showing a  $\geq 2$ -fold enrichment in NS4B-associated DMV fraction versus HA-tagged calnexin (CNX-HA) and having limma statistical q-values higher than 0.05 were used for gene ontology (GO) analysis. Cytoscape 3.7.2<sup>2</sup> and ClueGO<sup>3</sup> app were used to generate and visualize non-redundant biological terms for large clusters of protein accessions (human uniprot accession IDs) in a functionally grouped network. ClueGO results are illustrated as a functionally grouped network of terms. **a** Bar chart of ClueGO significant biological functional terms organized in multiple term occurrences. Numbers represent protein accessions per term. **b** ClueGO results represented as functionally grouped network of terms with node size showing significance of cluster.

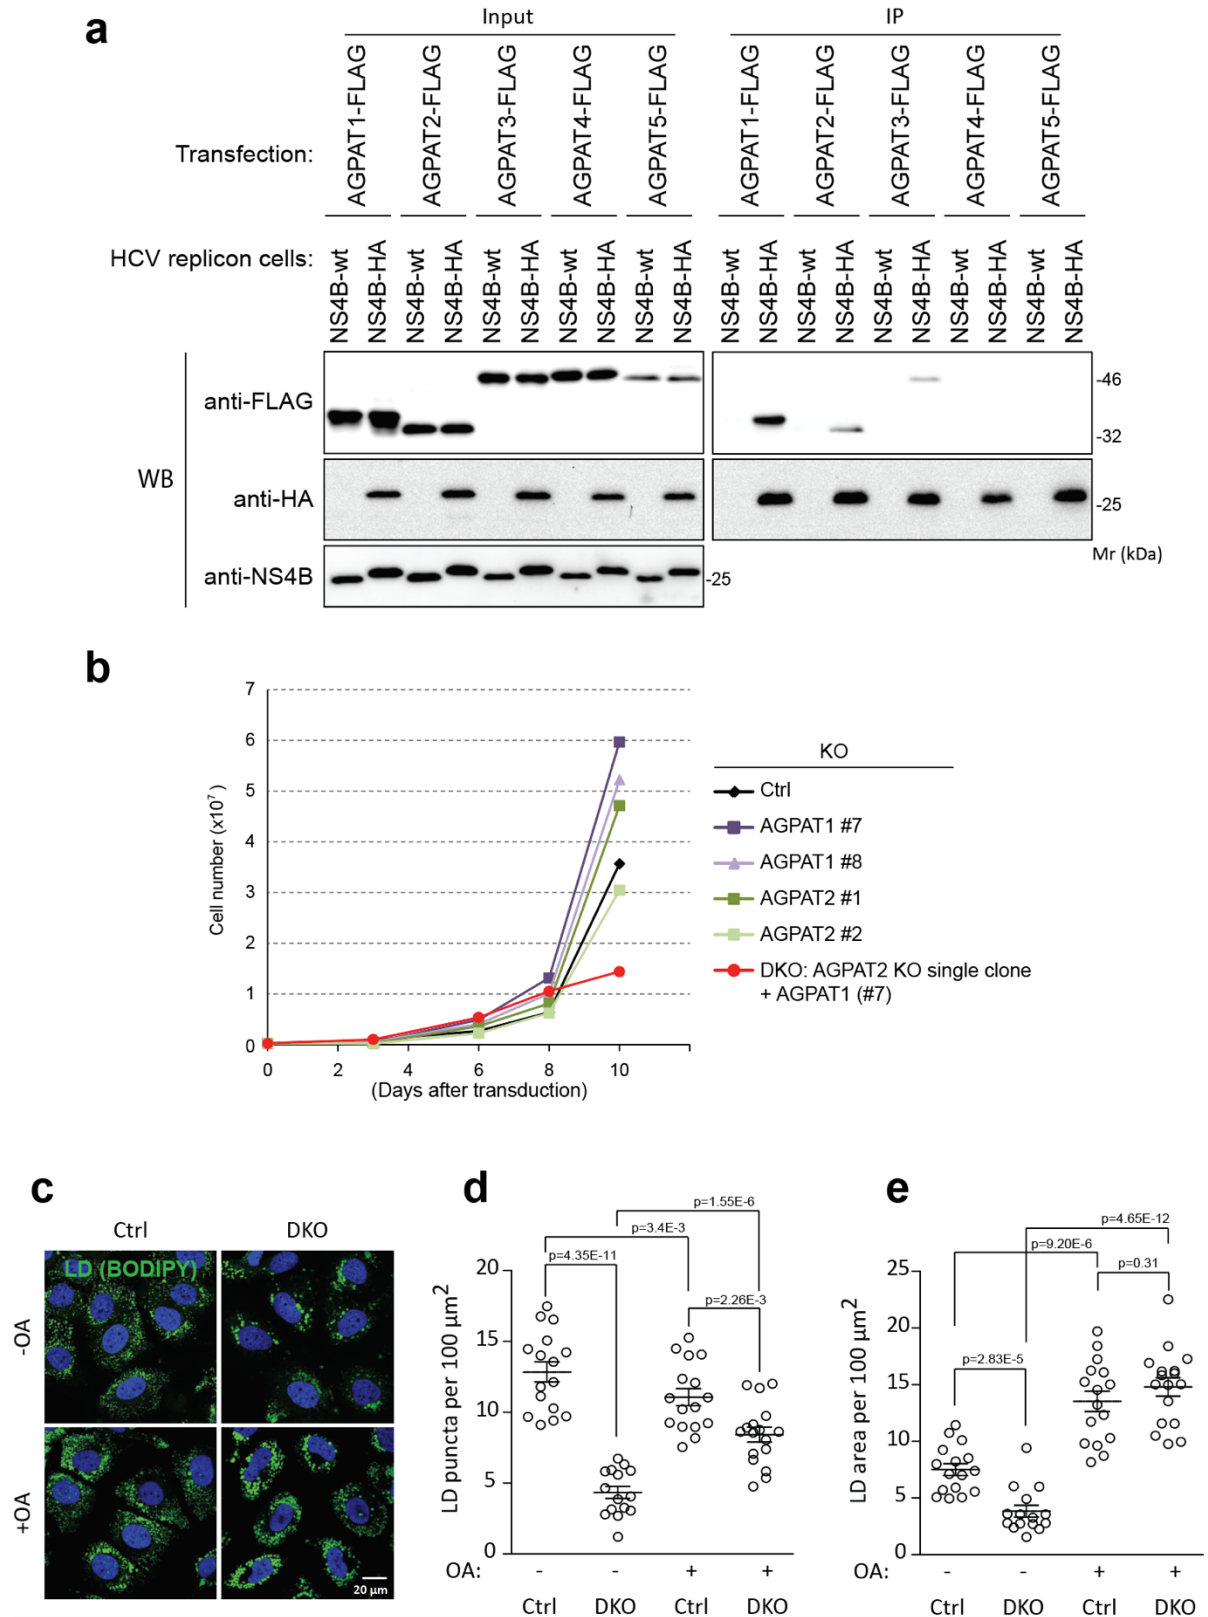

**Supplementary Figure 3. Interaction of NS4B with AGPAT isoforms and impact of single and double AGPAT1/2 knock-out on cell viability as well as lipid droplet formation.** **a** Huh7-Lunet cells containing a stably replicating HCV replicon with wildtype or HA-tagged NS4B were transfected to express FLAG-tagged AGPATs. Two days after transfection NS4B-HA enriched membrane fractions were prepared under native conditions by HA-specific immunoprecipitation (IP). Proteins in

lysates (1% of input) and captured protein complexes (20% of eluate) were analyzed by western blotting (WB). Three biologically independent experiments showed similar results. **b** Effect of AGPAT1/2 single and double knock-out on cell growth. Cells were infected with sgRNA encoding lentivirus on day-0 and expanded until day-10 using increasingly bigger culture dishes according to cell growth. Cell numbers were determined by using an automated cell counter. The experiment was repeated twice. **c-e** Control KO and AGPAT1/2 DKO cells were incubated without or with 50  $\mu$ M oleic acid-BSA (-OA and +OA, respectively) for 16 h. **c** Representative images. Lipid droplets (LD) and nuclear DNA were stained with BODIPY 493/503 (green) or DAPI (blue), respectively. **d, e** The number of LD puncta per 100  $\mu$ m<sup>2</sup> cell surface area (d) or total LD area per 100  $\mu$ m<sup>2</sup> (e) were determined and are given as average and SEM. n= more than 15 cells examined over two independent experiments. Significance was calculated by two-tailed paired t-test and p-values are indicated in the figure. Source data for panels a, b, d, e are provided as Source Data file.

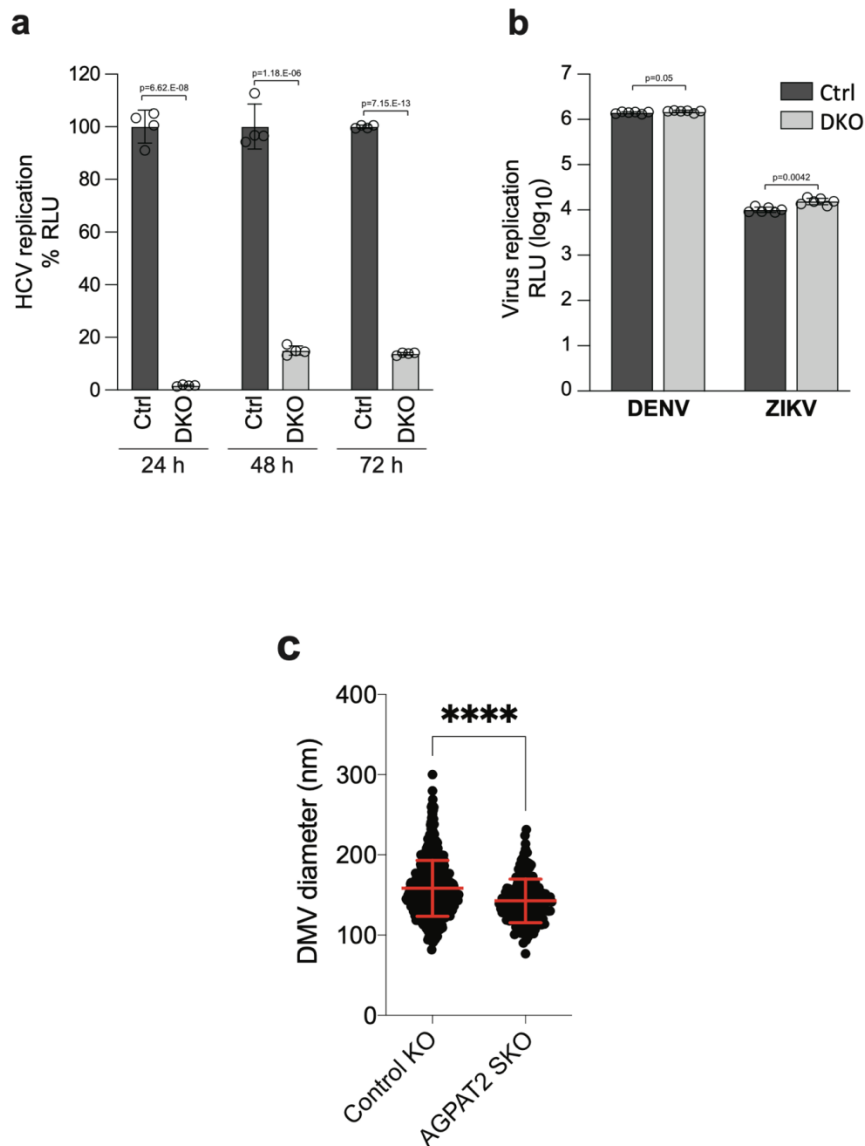

**Supplementary Figure 4. Effect of AGPAT1/2 DKO on replication and DMV formation of HCV and on replication of other flaviviruses.** **a** Huh7-Lunet/T7 cells were electroporated with in vitro transcripts of a subgenomic HCV reporter replicon encoding the firefly luciferase. Luciferase activities were analyzed at indicated time points after electroporation. Graph shows average and SD from 4 independent experiments. Significance was calculated by one-tailed paired t-test. p values are shown in the graph. **b** AGPAT1/2 DKO does not impair DENV and ZIKV replication. Cells were infected with DENV or ZIKV *renilla* luciferase reporter viruses and 48 h later, RNA replication was determined by luciferase assay. Values are expressed as average of RLU (log<sub>10</sub>) and SD from 6 independent experiments. Significance was calculated by one-tailed paired t-test. p values are shown in the graph. **c** Reduced HCV DMV diameter in AGPAT2 single (S)KO cells. Huh7-derived cells stably expressing the T7 RNA polymerase and without or with SKO of AGPAT 2 were transfected with the HCV replicase-encoding plasmid containing a GFP insertion in NS5A (construct pTM NS3-5B/5A-GFP)<sup>4</sup>. After 24 h, cells were fixed and subjected to CLEM. DMV diameters within whole cell sections were counted and plotted. Data are represented as mean ± SD. n= more than 174 DMVs from 5 cell sections. Significance was calculated by two-tailed paired t-test. \*\*\*\*, p=6.72597E-8. Source data for panels a, b, c are provided as Source Data file.

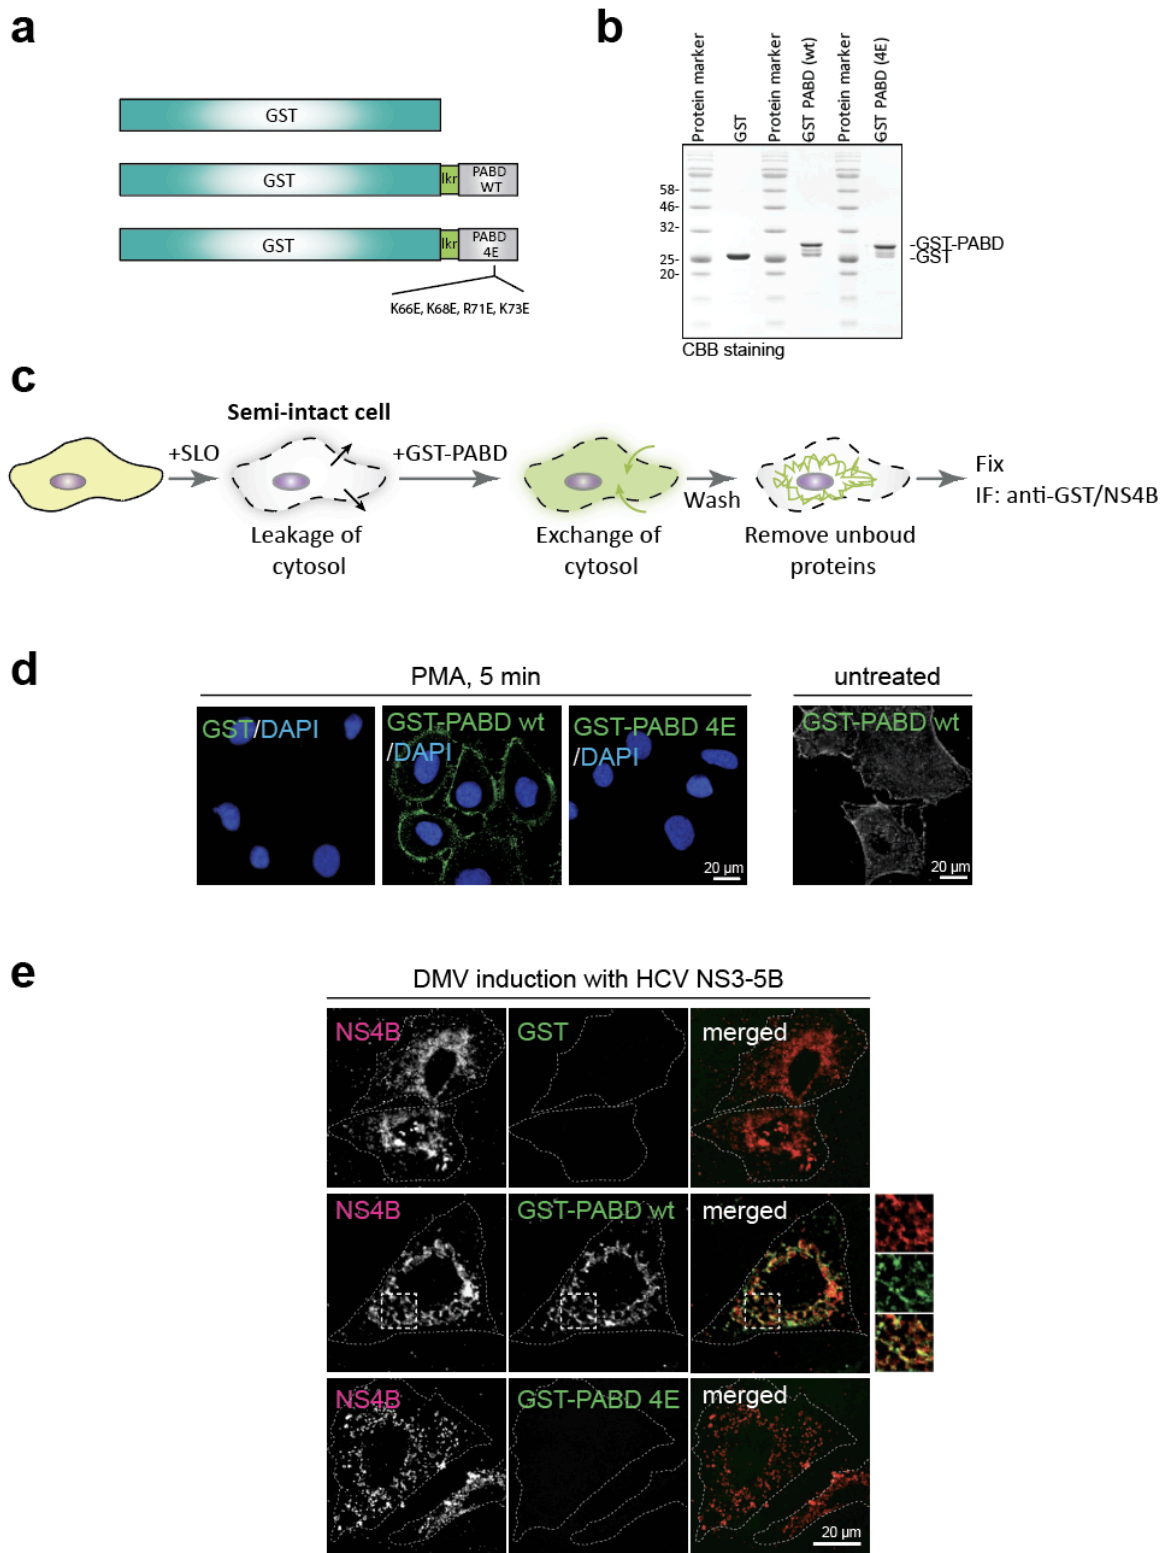

**Supplementary Figure 5. Subcellular PA distribution in HCV replicase-expressing cells as determined with a recombinant PA sensor.** **a** Schematic of the recombinant PA-binding protein that is composed of the glutathione S-transferase (GST) fused to the PA binding domain (PABD) of the Spo20 protein via a short linker (lkr). The 4E mutant contains 4 amino acid substitutions specified on the bottom. **b** Fusion proteins were expressed in *E. coli* and pre-purified cell lysates were subjected to GST-specific affinity chromatography. Five microgram recombinant protein were loaded onto a SDS-polyacrylamide gel that was stained with coomassie brilliant blue (CBB) after electrophoresis. Two



biologically independent experiments showed similar results. **c** Experimental approach to visualize PA with the exogenously added recombinant biosensor. Cells were transiently permeabilized by treatment with streptolysin O (SLO) that forms pores in the plasma membrane and allows the partial exchange of the cytosol against a physiological solution containing the purified recombinant PA biosensor. Bound GST-PABD and NS4B were visualized by immunofluorescence (IF) microscopy using GST- and NS4B-specific antibodies. **d** Functionality of the recombinant PA sensor. Huh7-Lunet/T7 cells were treated with 100 nM PMA for 5 min or left untreated and PA was visualized by IF using recombinant proteins specified on the top of each panel. Nuclear DNA was stained with DAPI to visualize all cells on the coverslip. Three biologically independent experiments showed similar results. **e** Huh7-Lunet/T7 cells were transfected with the HCV NS3-5B encoding plasmid, followed by permeabilization with SLO and addition of purified GST-PABD wt or 4E proteins. Bound proteins were detected by GST-specific immunofluorescence microscopy. Three biologically independent experiments showed similar results.

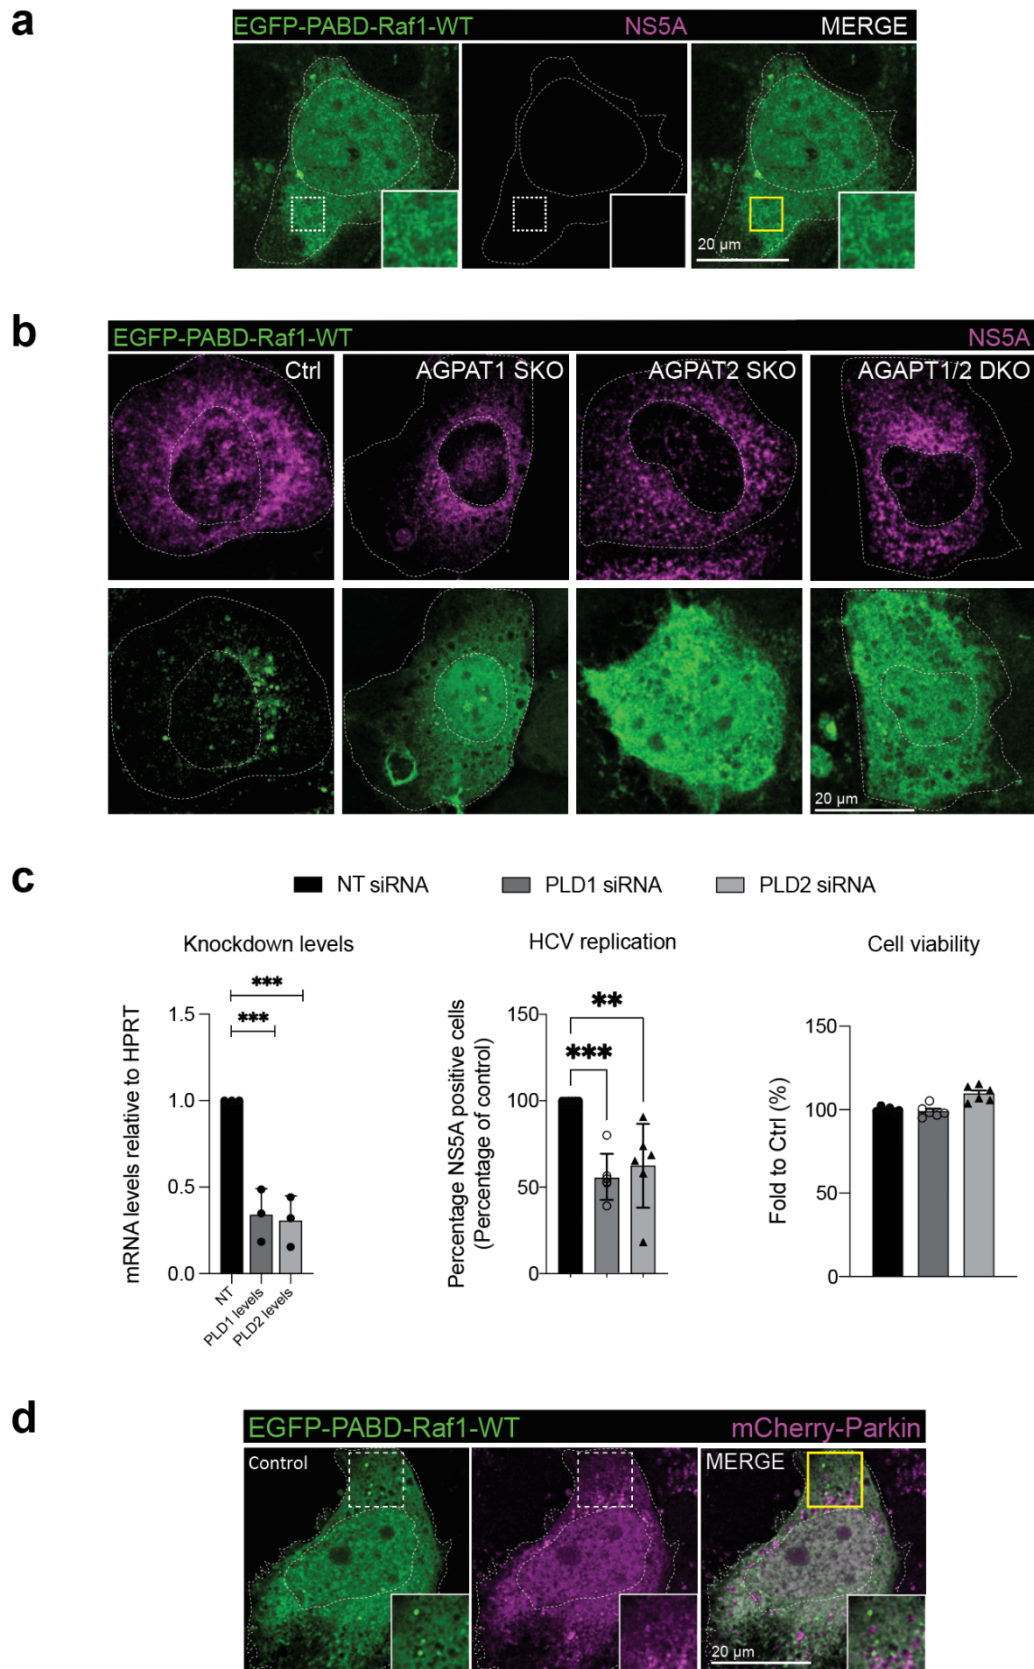

**Supplementary Figure 6. PA distribution in naïve Huh7-derived cells.** **a** Huh7-Lunet/T7 cells were transfected with a construct encoding EGFP-tagged wildtype (WT) PA sensor (construct pTM-EGFP-PABD-Raf1-WT). Twenty-four hours later, cells were fixed and GFP-PABD was visualized by

fluorescence microscopy. White boxes indicate regions magnified in the lower right of each panel. Data shown here belong to the results shown in Fig. 4a and they reveal a diffuse PA-sensor distribution in the absence of HCV NS3-5B expression. Two biologically independent experiments showed similar results. **b** Huh7-Lunet control, AGPAT2 single (SKO) and AGPAT1/2 double (D)KO cells were cotransfected with constructs encoding an EGFP-tagged wildtype (WT) PA sensor (construct pTM-EGFP-PABD-Raf1-WT) and HCV NS3-5B with NS5A having an in-frame insertion of mCherry (construct pTM NS3-3'/5A-mCherry). Twenty-four hours later, cells were fixed and EGFP-PABD and NS5A-mCherry were visualized by fluorescence microscopy. A representative result of three biologically independent experiments is shown. **c** PLD1 and PLD2 knock-down reduces HCV replication. Huh7.5 cells were transfected with siRNAs targeting PLD1 and PLD2 and 48 h later infected with HCV (strain Jc1; MOI=1). Twenty-four hours later, cells were fixed, immunostained for HCV NS5A and percentage of positive cells was quantified using CellProfiler. Normalized data from three biologically independent experiments are plotted. Data are represented as mean  $\pm$  SD. **d** Subcellular distribution of the PA-sensor and mCherry-Parkin in the absence of mitophagy. Huh7-derived cells were co-transfected with EGFP-PABD-Raf-1 and mCherry-tagged Parkin and 24 h later cells were fixed and analyzed by fluorescence microscopy. Two biologically independent experiments showed similar results. Data shown here belong to the results shown in Fig. 4c.

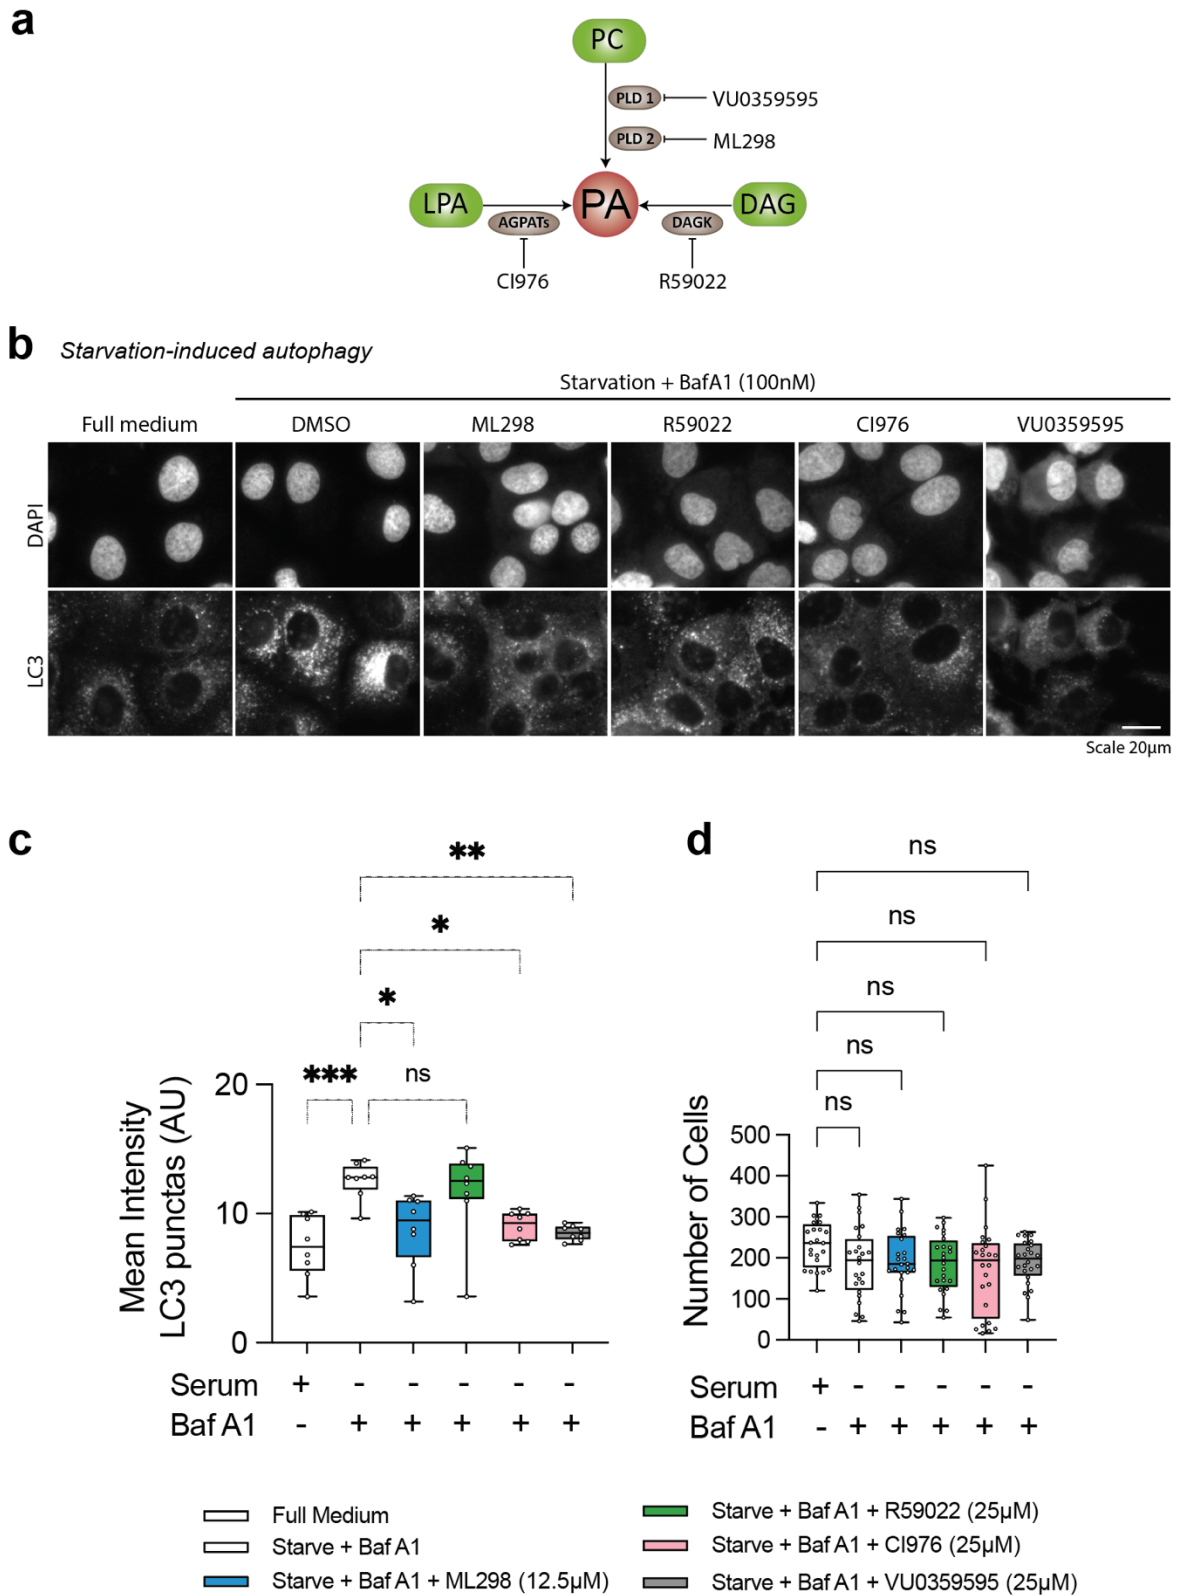

**Supplementary Figure 7. Inhibition of PA production through PLD1, PLD2 and AGPATs decreases LC3 accumulation during nonselective autophagy.** **a** PA biosynthesis pathways via lysophosphatidic acid (LPA), phosphatidylcholine (PC) and diacylglycerol (DAG), metabolized by AGPATs, PLDs and DAGK, respectively. **b** Effect of PA inhibitors on LC3 puncta. Huh7-Lunet/T7 cells were incubated in full medium or starvation medium containing BafA1, in the presence of PA inhibitors specified above the panels. After 3 h incubation, cells were fixed and stained with an LC3-

specific antibody followed by immunofluorescence microscopy. Nuclear DNA was stained with DAPI. Solvent (DMSO) treated cells served as control. **c** Quantification of mean LC3 puncta intensity per cell, and **d** total cells analyzed per condition, as determined by using a custom-made CellProfiler script that segments the LC3 puncta, nuclei and cell boundary and measures the intensities of LC3 puncta in the cytoplasmic area of single cells, indicated as a scatter plot with N=4000 cells per condition. The central line of the plot indicates median with first and third quartiles are shown as boxes, and whiskers as lines. Two biologically independent experiments gave similar results. Significance was calculated using ordinary one-way ANOVA. \*, p=0.0243 (ML298) and 0.0480 (CI976); \*\*, p=0.0078; \*\*\*, p=0.0009; ns, p=0.99.

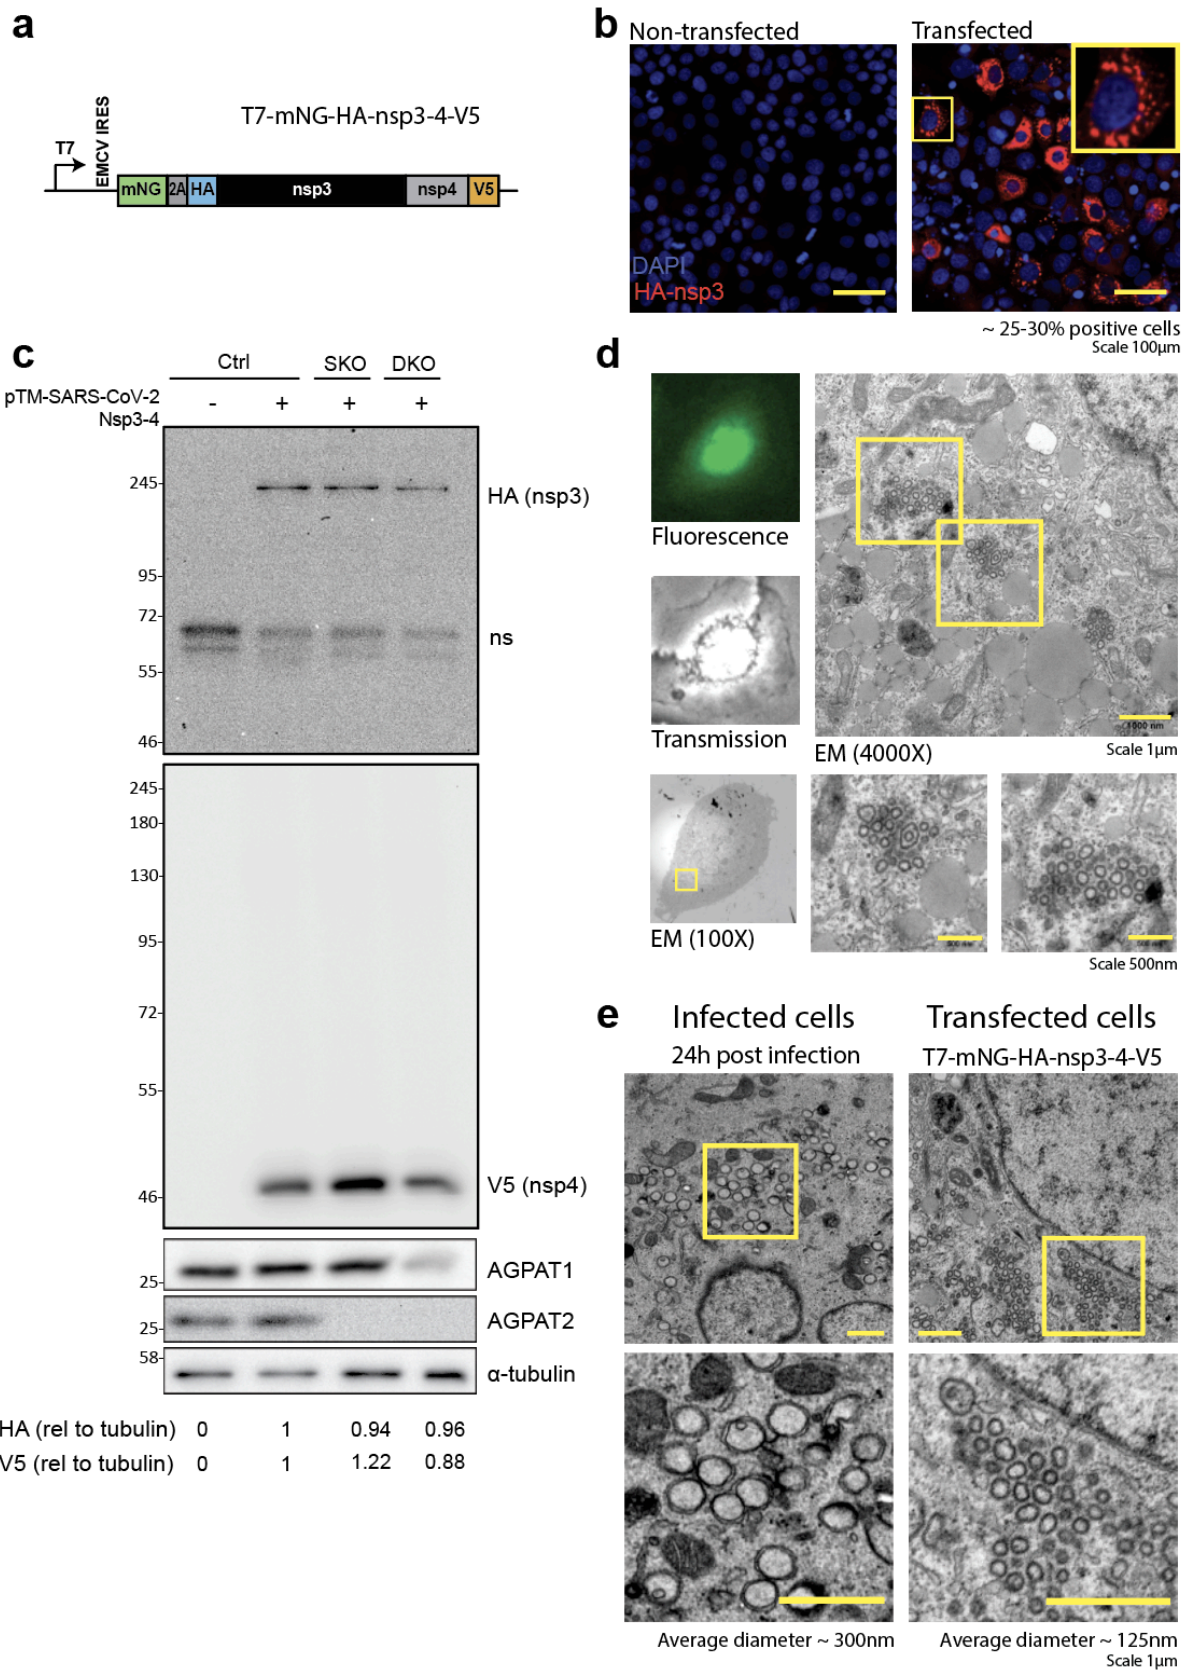

**Supplementary Figure 8. SARS-CoV-2 nsp3-4 induced DMVs are morphologically similar to infection induced DMVs, and effect of AGPAT KO on viral protein expression.** **a** Schematics of the T7-based expression construct encoding SARS-CoV-2 HA-nsp3-4-V5. mNG, NeonGreen. **b** Huh7-

derived cells were transfected with the SARS-CoV-2 HA-nsp3-4-V5 encoding plasmid and 24 h later cells were stained with an HA-specific antibody and analyzed by confocal microscopy to visualize HA-nsp3. Transfection efficiency given on the lower right was determined by cell counting. A magnification of the yellow boxed area is shown on the top right. Two biologically independent experiments showed similar results. **c** Abundance of SARS-CoV-2 proteins in transfected cells was quantified by western blotting using primary antibodies specified on the right of each panel.  $\alpha$ -tubulin served as loading control. Data in **c** belong to the results shown in Fig. 6c and d. ns, non-specific band. Two biologically independent experiments showed similar results. **d** CLEM for quantification of nsp3-4 induced DMVs. Huh-derived cells stably expressing the T7 RNA polymerase were transfected with the HA-nsp3-4-V5 encoding plasmid, mNeonGreen positive cells were identified by fluorescence microscopy and selected for transmission electron microscopy. Yellow boxed regions are highlighted on the right panel and the two panels below, respectively. Two biologically independent experiments showed similar results. **e** Comparison of HA-nsp3-4-V5 induced DMVs (as in d) with DMVs induced in SARS-CoV-2 infected Calu-3 cells as determined by transmission electron microscopy. Average diameters of DMVs are given on the bottom. Diameter calculations are based on the analysis of at least 10 infected cells (as reported earlier<sup>5</sup>) or ~1650 DMVs detected in transfected cells. Source data for panel c are provided as Source Data file.

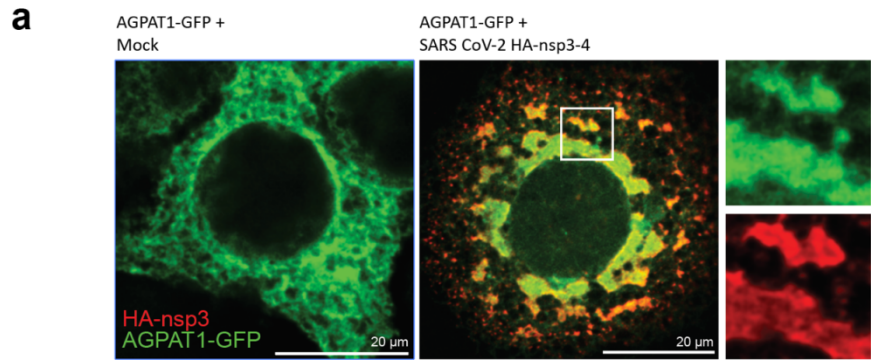

**b** Image-based pipeline setup

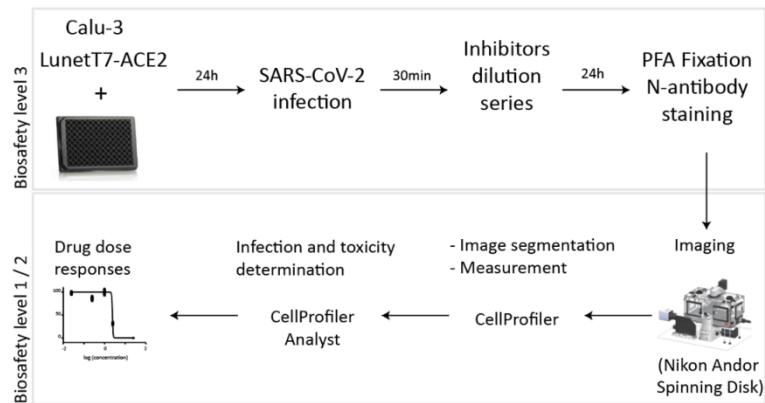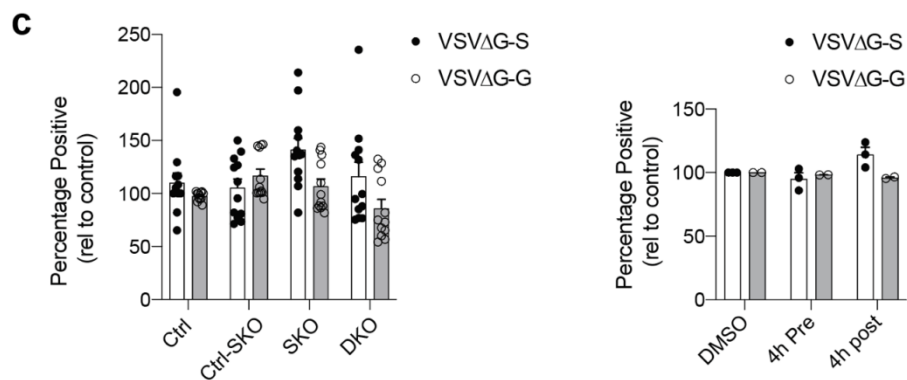

**Supplementary Figure 9. AGPATs are re-localised to SARS-CoV-2 nsp3 containing structures, imaging based pipeline to quantify viral replication and role of AGPAT in SARS-CoV-2 entry. a** Huh7-derived cells were co-transfected with AGPAT1-EGFP and SARS-CoV-2 HA-nsp3-4-V5 encoding plasmids. After 48 h cells were stained with HA-specific antibody and analyzed by confocal microscopy to visualize HA-nsp3 and AGPAT1-GFP. White square indicates the area shown as magnification on the right. **b** Schematics of the image-based approach used for the determination of SARS-CoV-2 replication and spread. In some experiments, infected cells were treated with drugs as indicated. **c** AGPATs are not involved in SARS-CoV-2 entry. Left panel: Huh7-Lunet control, AGPAT2 single (SKO) and AGPAT1/2 double (DKO) cells stably expressing human ACE2 were infected with VSVΔG-G and VSVΔG-S pseudoviruses encoding GFP. Twenty-four hours later, cells were fixed, nuclear DNA was stained with DAPI, and the percentage of GFP-positive cells was determined using CellProfiler. Normalized data from three biologically independent experiments are plotted. Right panel: Huh7-derived cells expressing human ACE2 were either pre- or post-incubated



with the AGPAT inhibitor CI976 (10  $\mu$ M) for 4 h and infected with VSV $\Delta$ G-G or VSV $\Delta$ G-S pseudoviruses. Twenty-four hours later, cells were fixed, nuclear DNA was stained with DAPI, and the percentage of GFP-positive cells was determined using CellProfiler. Normalized data from three biologically independent experiments are plotted.

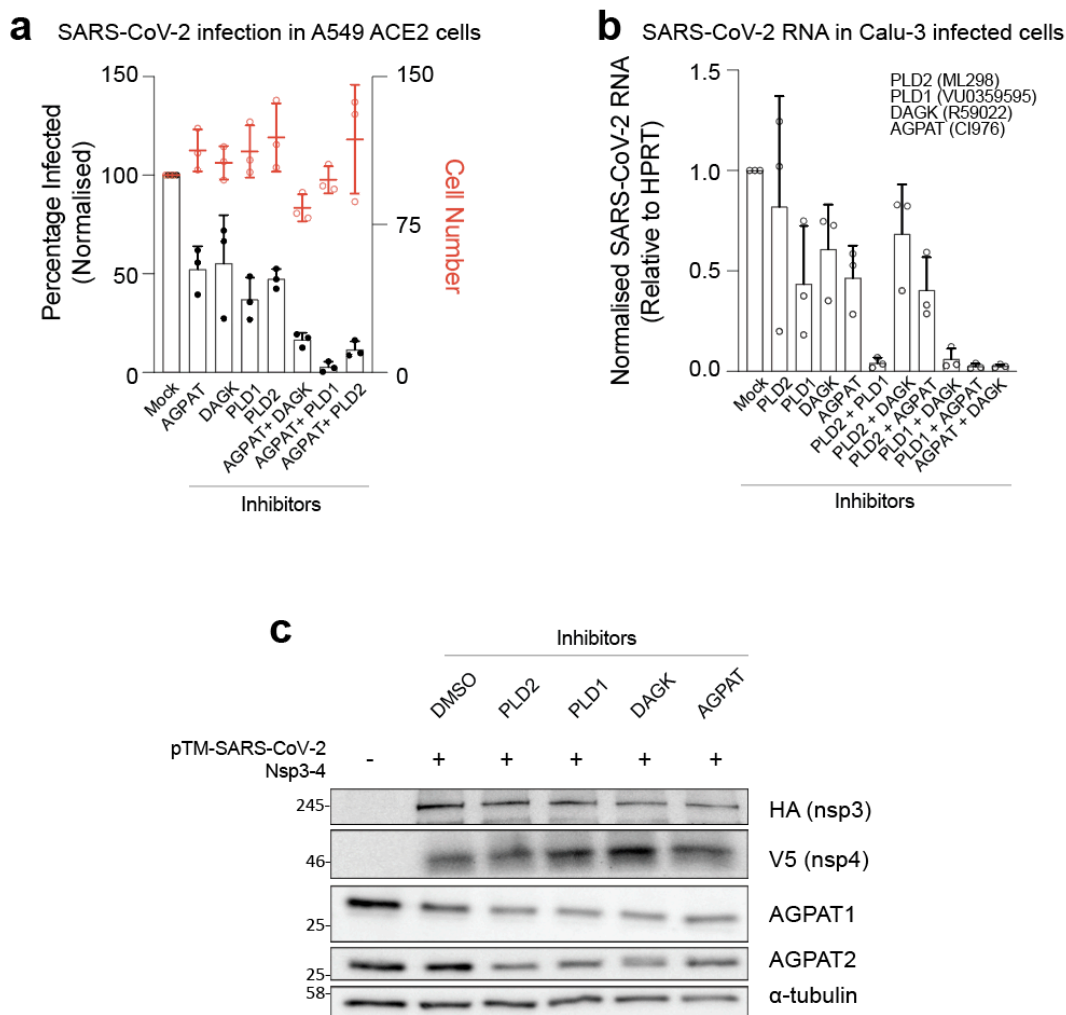

**Supplementary Figure 10. Alternative PA production pathways contribute to SARS-CoV-2 replication.** **a** A549 cells stably expressing ACE2 were infected with SARS-CoV-2 (MOI=5) and incubated with AGPAT, PLD1/2, or DAGK inhibitors, or given combinations thereof, using concentrations corresponding to IC50 values. Cells were fixed 24 h after infection and stained with a nucleocapsid-specific antibody, followed by immunofluorescence microscopy and CellProfiler based analysis. Data is normalized to the Mock, which on average has ~35% infected cells. Data are represented as mean  $\pm$  SD from 3 biologically independent experiments. **b** Calu-3 cells were infected with SARS-CoV-2 (MOI=12) for 2 h, followed by incubation with AGPAT, PLD1/2, or DAGK inhibitors using concentrations corresponding to IC50 values. Total RNA was harvested 6 h after infection and SARS-CoV-2 RNA was quantified relative to cellular HPRT mRNA using RT-qPCR. Higher MOI than in (a) was used since first, unbound virus was washed away after 2 h and second, viral replication was measured at 6 h rather than 24 h after infection. Data are represented as mean  $\pm$  SD from 3 biologically independent experiments. **c** PA pathway inhibitors do not affect SARS-CoV-2 nsp3-4 expression or processing. Huh7-Lunet/T7 cells were transfected with plasmid pTM-nsp3-4-2A-mNG encoding SARS-CoV-2 HA-nsp3-4-V5 and fluorescent NeonGreen. After 4 h, inhibitors specified on the top were added. Twenty-four hours later, total cell lysates were collected and expression levels of indicated proteins were analyzed by western blotting.  $\alpha$ -tubulin served as loading control. These data belong to the results shown in Fig. 8c. A representative result of three biologically independent experiments is shown.

## Supplementary Tables

**Supplementary Table 1. Plasmids used in this study**

| Plasmid Name                                                   | Backbone                 | Epitope tag/<br>reporter                | Selection<br>(E.coli/mam<br>malian cell) | Reference                       |
|----------------------------------------------------------------|--------------------------|-----------------------------------------|------------------------------------------|---------------------------------|
| pFK-JcR2a- $\delta$ g (JcR2a)                                  | pFK, derived from pBR322 | <i>Renilla</i> Luciferase               | Amp                                      | <sup>6</sup>                    |
| pFK-Jc1- $\delta$ g (Jc1),                                     | pFK, derived from pBR322 |                                         | Amp                                      | <sup>7</sup>                    |
| pFK_i389LucNS3-3'_JFH1 $\delta$ g (genotype 2a)                | pFK, derived from pBR322 | <i>Firefly</i> Luciferase               | Amp                                      | <sup>8</sup>                    |
| pFK_i389Luc_NS3-3'JFH1 $\delta$ g (genotype 2a) (NS5A-mcherry) | pFK, derived from pBR322 | NS5A-mCherry/ <i>Firefly</i> Luciferase | Amp                                      | <sup>4</sup>                    |
| pTM NS3-5B                                                     | pTM1-2                   |                                         | Amp                                      | <sup>9</sup>                    |
| pTM NS3-5B (NS5A-mcherry)                                      | pTM1-2                   | NS5A-mCherry                            | Amp                                      | <sup>4</sup>                    |
| pWPI-EGFP-CT                                                   | pWPI                     | EGFP                                    | Amp/Blasti                               | This study.                     |
| pWPI-EGFP-NT                                                   | pWPI                     | EGFP                                    | Amp/Blasti                               | This study.                     |
| pWPI-mCherry-NT                                                | pWPI                     | mCherry                                 | Amp/Blasti                               | This study.                     |
| pWPI-AGPAT1-EGFP                                               | pWPI-EGFP                | AGPAT1-EGFP                             | Amp/Blasti                               | This study.                     |
| pWPI-AGPAT2-EGFP                                               | pWPI-EGFP                | AGPAT2-EGFP                             | Amp/Blasti                               | This study.                     |
| pWPI-EGFP-2xPABD                                               | pWPI-EGFP                | EGFP-2xPABD (Spo20p)                    | Amp/Blasti                               | This study.                     |
| pWPI-EGFP-2xPABD_4E                                            | pWPI-EGFP                | EGFP-2xPABD_4E (Spo20p)                 | Amp/Blasti                               | This study.                     |
| pGEX-PABD                                                      | pGEX-6P-1                | GST-1xPABD (Spo20p)                     | Amp                                      | This study.                     |
| pGEX-PABD_4E                                                   | pGEX-6P-1                | GST-1xPABD_4E (Spo20p)                  | Amp                                      | This study.                     |
| pWPI-mCherry-Parkin                                            | pWPI-mCherry             | mCherry-Parkin                          | Amp/Blasti                               | This study.                     |
| pWPI-T7-Zeo                                                    | pWPI                     |                                         | Amp/Zeo                                  | <sup>10</sup>                   |
| pCMV-dR8.91                                                    | pCMV                     |                                         | Amp                                      | kind gift from Dr. Didier Trono |
| pMD2.G                                                         |                          |                                         | Amp                                      | kind gift from Dr. Didier Trono |
| lentiCRISPR v2                                                 | lentiCRISPR v2           |                                         | Amp/Puro                                 | Addgene                         |
| lentiCRISPR_blasticidin                                        | lentiCRISPR v2           |                                         | Amp/Blasti                               | <sup>11</sup>                   |
| lentiCRISPR_AGPAT1 #7                                          | lentiCRISPR v2           |                                         | Amp/Puro                                 | This study.                     |

|                                               |                         |                            |            |             |
|-----------------------------------------------|-------------------------|----------------------------|------------|-------------|
| lentiCRISPR_AGPAT1 #8                         | lentiCRISPR v2          |                            | Amp/Puro   | This study. |
| lentiCRISPR_AGPAT2 #1                         | lentiCRISPR_blasticidin |                            | Amp/Blasti | This study. |
| lentiCRISPR_AGPAT2 #2                         | lentiCRISPR_blasticidin |                            | Amp/Blasti | This study. |
| pWPI-AGPAT1_sgRNA-resistant_wild-type (WT)    | pWPI                    |                            | Amp/Blasti | This study. |
| pWPI-AGPAT1_sgRNA-resistant_H104A, D109N (M1) | pWPI                    |                            | Amp/Blasti | This study. |
| pWPI-AGPAT1_sgRNA-resistant_E178Q, R181A (M2) | pWPI                    |                            | Amp/Blasti | This study. |
| pWPI-AGPAT2_sgRNA-resistant_wild-type (WT)    | pWPI                    |                            | Amp/Puro   | This study. |
| pWPI-AGPAT2_sgRNA-resistant_H98A, D103N (M1)  | pWPI                    |                            | Amp/Puro   | This study. |
| pWPI-AGPAT2_sgRNA-resistant_E172Q, R175A (M2) | pWPI                    |                            | Amp/Puro   | This study. |
| pTM-EGFP-PABD-Raf1_WT                         | pTM1-2                  | EGFP-PABD_WT (Raf1)        | Amp        | This study  |
| pTM-EGFP-PABD-Raf1_4E                         | pTM1-2                  | EGFP-PABD_4E (Raf1)        | Amp        | This study  |
| pWPI-EGFP-PABD-Raf1_WT                        | pWPI                    | EGFP-PABD_WT (Raf1)        | Amp/Blasti | This study  |
| pWPI-EGFP-PABD-Raf1_4E                        | pWPI                    | EGFP-PABD_4E (Raf1)        | Amp/Blasti | This study  |
| pcDNA3.1-SARS-CoV-2_HA-Nsp3-4-V5              | pcDNA3.1                | HA-Nsp3 Nsp4-V5            | Amp        | This study  |
| pTM SARS-CoV-2_HA-Nsp3-4-V5 (IRES-mNG)        | pTM1-2                  | mNeonGreen HA-Nsp3 Nsp4-V5 | Amp        | This study  |
| pCMV3-SARS-CoV-2-Spike-codon-optimized-dCTD3  | pCMV3                   |                            | Amp/Hygro  | This study  |

Amp, ampicillin; Blasti, blasticidin; Zeo, zeocine; Puro, puromycin; Hygro, Hygromycin B.

**Supplementary Table 2. Reagents and resources used in this study**

| Reagents or Resources                          | Source                      | Identifier            |
|------------------------------------------------|-----------------------------|-----------------------|
| DAPI                                           | MoBiTec                     | MFPCCF A-211          |
| LipidtoX                                       | Thermo Fisher Scientific    | H34477                |
| BODIPY493/503                                  | Thermo Fisher Scientific    | D3922                 |
| Oleic acid-BSA                                 | Sigma Aldrich               | O3008                 |
| Mifepristone                                   | Sigma Aldrich               | M8046-500MG           |
| Fluoromount-G                                  | Southern Biotech            | 0100-01               |
| Phorbol 12-myristate 13-acetate (PMA)          | Sigma Aldrich               | P8139                 |
| Bafilomycin A1 (BafA1)                         | Sigma Aldrich               | B1793                 |
| Valinomycin (Val)                              | Sigma Aldrich               | V0627                 |
| TransIT-LT1 transfection reagent               | Mirus Bio                   | MIR 2305              |
| In-Fusion HD Cloning Plus                      | TAKARA Bio                  | 638909                |
| NEB Hi-Fi Assembly Kit                         | New England Biolabs Inc     | E2621S                |
| Platinum™ SuperFi™ PCR Master Mix              | Thermo Fisher Scientific    | 12358010              |
| IPTG                                           | Thermo Fisher Scientific    | 15529019              |
| Slide-A-Lyzer Dialysis Cassettes, 7K MWCO      | Thermo Fisher Scientific    | 66370                 |
| streptolysin O (SLO)                           | Sigma Aldrich               | SAE0089               |
| Creatine Kinase (CK)                           | Sigma Aldrich               | CK-RO, 10127566001    |
| Creatine phosphate                             | Sigma Aldrich               | CRPHO-RO, 10621714001 |
| Guanosine 5'-triphosphate sodium salt hydrate  | Sigma Aldrich               | G8877                 |
| Pierce Anti-HA Magnetic Beads                  | Thermo Fisher Scientific    | 88836                 |
| Pierce GST Spin Purification Kit               | Thermo Fisher Scientific    | 16107                 |
| CellTiter-Glo Luminescent Cell Viability Assay | Promega                     | G7570                 |
| ECL plus reagent                               | Perkin Elmer Inc.           | NEL104001EA           |
| DTT                                            | Sigma Aldrich               | D0632                 |
| Glycyl Glycin                                  | Sigma Aldrich               | G3915                 |
| ATP                                            | Sigma Aldrich               | A2383                 |
| D-Luciferin                                    | PJK GmbH                    | 102111                |
| Coelenterazine                                 | PJK GmbH                    | 102161                |
| Paraformaldehyde                               | Sigma Aldrich               | 158127                |
| 25% Glutaraldehyde                             | Electron Microscopy Science | 16220                 |
| 16% Paraformaldehyde Aqueous Solution          | Electron Microscopy Science | 15710                 |
| 4% Osmium Tetroxide                            | Electron Microscopy Science | 19150                 |
| ML298                                          | Sigma Aldrich               | SML1077               |
| VU0359595                                      | Sigma Aldrich               | SML0566               |
| FIPI Hydrochloride Hydrate                     | Sigma Aldrich               | F5807                 |

|        |               |       |
|--------|---------------|-------|
| R59022 | Sigma Aldrich | D5919 |
|--------|---------------|-------|

### Supplementary Table 3. Antibodies used in this study

| Primary antibody                             | Source                         | Identifier |
|----------------------------------------------|--------------------------------|------------|
| rabbit anti-HCV NS4B polyclonal antibody     | <sup>12</sup>                  | -          |
| mouse anti-HCV NS5A monoclonal antibody      | <sup>12</sup>                  | -          |
| rabbit anti-AGPAT1 polyclonal antibody       | Atlas Antibodies               | HPA073355  |
| rabbit anti-AGPAT2 monoclonal antibody       | Cell Signaling                 | 14937      |
| mouse anti-alpha-tubulin monoclonal antibody | Sigma Aldrich                  | T5168      |
| mouse anti-beta-actin monoclonal antibody    | Sigma Aldrich                  | A5441      |
| rabbit anti-LC3 polyclonal antibody          | MBL                            | PM036      |
| mouse anti-HA monoclonal antibody            | Sigma Aldrich                  | H3663      |
| rabbit anti-HA polyclonal antibody           | Thermo Fisher Scientific       | PA1-985    |
| mouse anti-V5 monoclonal antibody            | GeneTex                        | GTX628529  |
| rabbit anti-V5 polyclonal antibody           | GeneTex                        | GTX117997  |
| mouse anti-GST monoclonal antibody           | Santa Cruz                     | sc-138     |
| <b>mouse anti-Nucleocapsid antibody</b>      | Sino Biological                | 40143-V08B |
| mouse anti-GFP antibody                      | Clontech                       | 632381     |
| mouse anti-Flag antibody                     | Sigma Aldrich                  | F1804      |
| mouse anti-VSV-G antibody                    | Produced in I1-Hybridoma cells | -          |

| Secondary antibody                      | Source        | Identifier |
|-----------------------------------------|---------------|------------|
| Goat anti-rabbit IgG-HRP                | Sigma Aldrich | A6154      |
| Goat anti-mouse IgG-HRP                 | Sigma Aldrich | A4416      |
| Alexa Fluor 488 donkey anti-rabbit IgG  | Thermofisher  | A-21206    |
| Alexa Fluor 488 donkey anti-mouse IgG   | Thermofisher  | A-21202    |
| Alexa Fluor 488 donkey anti-mouse IgG2a | Thermofisher  | A-21131    |
| Alexa Fluor 568 donkey anti-rabbit IgG  | Thermofisher  | A-10042    |
| Alexa Fluor 568 donkey anti-mouse IgG   | Thermofisher  | A-10037    |
| Alexa Fluor 568 donkey anti-mouse IgG1  | Thermofisher  | A-21124    |

**Supplementary Table 4. Cell lines used in this study**

| Descriptor                                             | Parental cell line | resistance                               | reference     |
|--------------------------------------------------------|--------------------|------------------------------------------|---------------|
| HEK-293T                                               | HEK-293T           |                                          | <sup>13</sup> |
| Huh7.5                                                 | Huh7.5             |                                          | <sup>14</sup> |
| Huh7-Lunet                                             | Huh7-Lunet         |                                          | <sup>15</sup> |
| Huh7.5/Fluc                                            | Huh7.5             | Geneticin                                | <sup>6</sup>  |
| Huh7-Lunet/T7                                          | Huh7-Lunet         | Zeocin                                   | <sup>9</sup>  |
| Huh7-Lunet/CD81H                                       | Huh7-Lunet         | Geneticin                                | <sup>16</sup> |
| Huh7-Lunet/subgenomic replicon [HCV wt]                | Huh7-Lunet         | Geneticin                                | <sup>12</sup> |
| Huh7-Lunet/subgenomic replicon (sg4B HA31R) [HCV 4BHA] | Huh7-Lunet         | Geneticin                                | <sup>12</sup> |
| Huh7-Lunet/calnexin <sup>HA</sup> [CNX <sup>HA</sup> ] | Huh7-Lunet         | Geneticin                                | <sup>12</sup> |
| Huh7-Lunet/AGPAT1-EGFP                                 | Huh7-Lunet         | Blasticidin                              | This study.   |
| Huh7-Lunet/AGPAT2-EGFP                                 | Huh7-Lunet         | Blasticidin                              | This study.   |
| Huh7.5/AGPAT1_sgRNA-resistant_wild-type (WT)           | Huh7.5             | Blasticidin                              | This study.   |
| Huh7.5/AGPAT1_sgRNA-resistant_H104A, D109N (M1)        | Huh7.5             | Blasticidin                              | This study.   |
| Huh7.5/AGPAT1_sgRNA-resistant_E178Q, R181A (M2)        | Huh7.5             | Blasticidin                              | This study.   |
| Huh7.5/AGPAT2_sgRNA-resistant_wild-type (WT)           | Huh7.5             | Puromycin                                | This study.   |
| Huh7.5/AGPAT2_sgRNA-resistant_H98A, D103N (M1)         | Huh7.5             | Puromycin                                | This study.   |
| Huh7.5/AGPAT2_sgRNA-resistant_E172Q, R175A (M2)        | Huh7.5             | Puromycin                                | This study.   |
| Huh7-Lunet/T7/mCherry-Parkin                           | Huh7-Lunet         | Zeocin, Blasticidin                      | This study.   |
| Huh7-Lunet/CD81H/mCherry-Parkin                        | Huh7-Lunet         | Geneticin                                | This study.   |
| Huh7-Lunet/T7/Control KO                               | Huh7-Lunet         | Zeocin, Puromycin                        | This study.   |
| Huh7-Lunet/T7/AGPAT DKO                                | Huh7-Lunet         | Zeocin, Blasticidin, Puromycin           | This study.   |
| Huh7-Lunet/T7/ACE2                                     | Huh7-Lunet         | Zeocin, Blasticidin, Puromycin, Neomycin | This study.   |
| A549-ACE2                                              | A549               | Neomycin                                 | <sup>5</sup>  |
| Calu-3                                                 | Calu-3             |                                          | <sup>5</sup>  |

|              |                                                                |                        |                 |
|--------------|----------------------------------------------------------------|------------------------|-----------------|
| BHK-G43      | BHK-21                                                         | Hygromycin B<br>Zeocin | <sup>17</sup>   |
| I1-Hybridoma | Primary murine spleen cells and Sp2/0-Ag14 mouse myeloma cells |                        | ATCC: CRL-2700™ |

**Supplementary Table 5. Vectors and guide RNAs used to generate AGPAT KO cells**

| Expression plamid     | Target gene | Guide RNA                  |
|-----------------------|-------------|----------------------------|
| lentiCRISPR_AGPAT1 #7 | AGPAT1      | 5-GGGGCTGCAGAACCACAGGG-3   |
| lentiCRISPR_AGPAT1 #8 | AGPAT1      | 5'-GAGGGAACGAGAAACCACAA-3' |
| lentiCRISPR_AGPAT2 #1 | AGPAT2      | 5'-CGCGGCCGAGTTCTACGCCA-3' |
| lentiCRISPR_AGPAT2 #2 | AGPAT2      | 5'-CTTTTACGGGCTCCGCTTCG-3' |

## References

1. Ritchie ME, *et al.* limma powers differential expression analyses for RNA-sequencing and microarray studies. *Nucleic Acids Res* **43**, e47 (2015).
2. Shannon P, *et al.* Cytoscape: a software environment for integrated models of biomolecular interaction networks. *Genome Res* **13**, 2498-2504 (2003).
3. Bindea G, *et al.* ClueGO: a Cytoscape plug-in to decipher functionally grouped gene ontology and pathway annotation networks. *Bioinformatics* **25**, 1091-1093 (2009).
4. Lee JY, *et al.* Spatiotemporal Coupling of the Hepatitis C Virus Replication Cycle by Creating a Lipid Droplet- Proximal Membranous Replication Compartment. *Cell Rep* **27**, 3602-3617 e3605 (2019).
5. Cortese M, *et al.* Integrative Imaging Reveals SARS-CoV-2-Induced Reshaping of Subcellular Morphologies. *Cell Host Microbe* **28**, 853-866 e855 (2020).
6. Reiss S, *et al.* Recruitment and activation of a lipid kinase by hepatitis C virus NS5A is essential for integrity of the membranous replication compartment. *Cell Host Microbe* **9**, 32-45 (2011).
7. Pietschmann T, *et al.* Construction and characterization of infectious intragenotypic and intergenotypic hepatitis C virus chimeras. *Proc Natl Acad Sci U S A* **103**, 7408-7413 (2006).



8. Lohmann V, Korner F, Koch J, Herian U, Theilmann L, Bartenschlager R. Replication of subgenomic hepatitis C virus RNAs in a hepatoma cell line. *Science* **285**, 110-113 (1999).
9. Backes P, *et al.* Role of annexin A2 in the production of infectious hepatitis C virus particles. *J Virol* **84**, 5775-5789 (2010).
10. Fuerst TR, Niles EG, Studier FW, Moss B. Eukaryotic transient-expression system based on recombinant vaccinia virus that synthesizes bacteriophage T7 RNA polymerase. *Proc Natl Acad Sci U S A* **83**, 8122-8126 (1986).
11. Neufeldt CJ, *et al.* ER-shaping atlastin proteins act as central hubs to promote flavivirus replication and virion assembly. *Nat Microbiol*, (2019).
12. Paul D, Hoppe S, Saher G, Krijnse-Locker J, Bartenschlager R. Morphological and biochemical characterization of the membranous hepatitis C virus replication compartment. *J Virol* **87**, 10612-10627 (2013).
13. Graham FL, Smiley J, Russell WC, Nairn R. Characteristics of a human cell line transformed by DNA from human adenovirus type 5. *J Gen Virol* **36**, 59-74 (1977).
14. Blight KJ, McKeating JA, Rice CM. Highly permissive cell lines for subgenomic and genomic hepatitis C virus RNA replication. *J Virol* **76**, 13001-13014 (2002).
15. Friebe P, Boudet J, Simorre JP, Bartenschlager R. Kissing-loop interaction in the 3' end of the hepatitis C virus genome essential for RNA replication. *J Virol* **79**, 380-392 (2005).
16. Koutsoudakis G, *et al.* Characterization of the early steps of hepatitis C virus infection by using luciferase reporter viruses. *J Virol* **80**, 5308-5320 (2006).
17. Berger Rentsch M, Zimmer G. A vesicular stomatitis virus replicon-based bioassay for the rapid and sensitive determination of multi-species type I interferon. *PLoS One* **6**, e25858 (2011).

## Source Blots

Fig. 1d

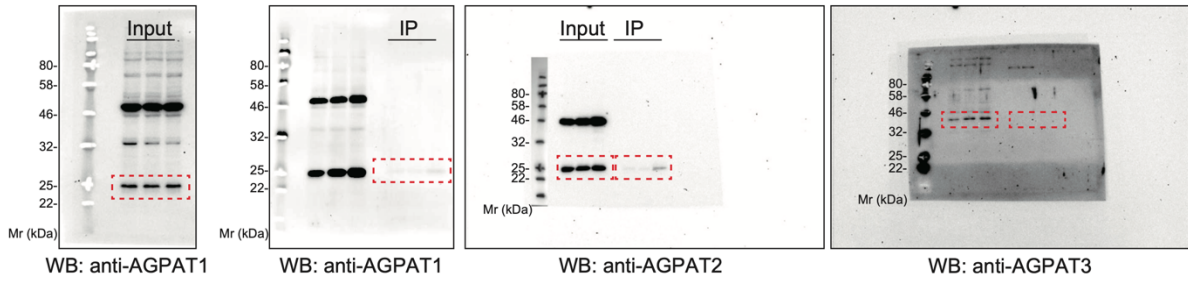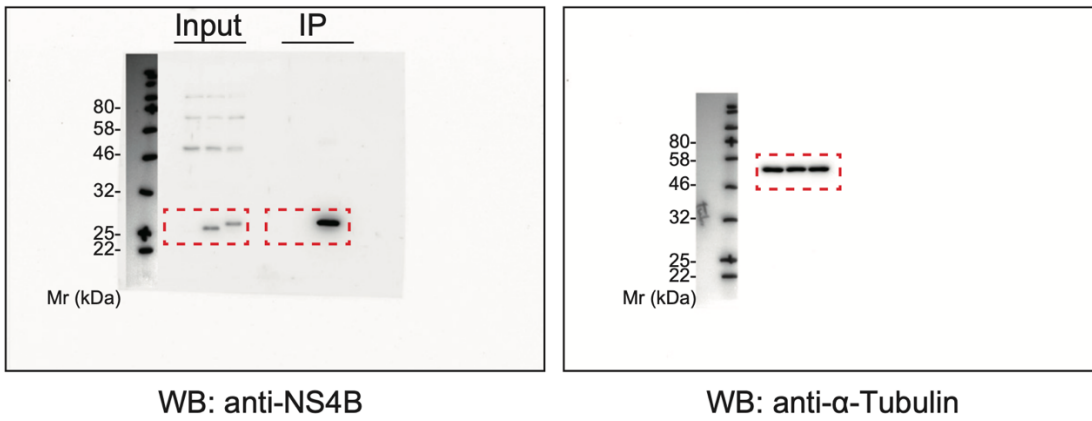

Fig. 1f

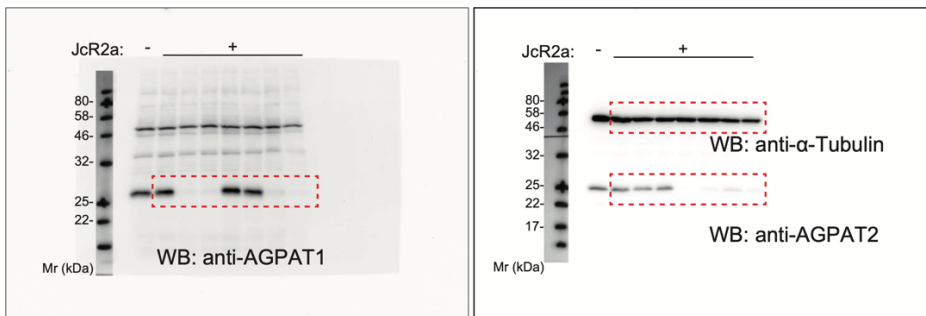

Fig. 1g

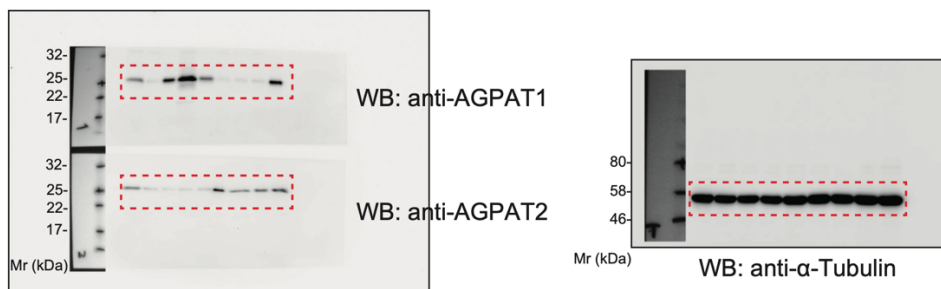

**Fig. 2c**

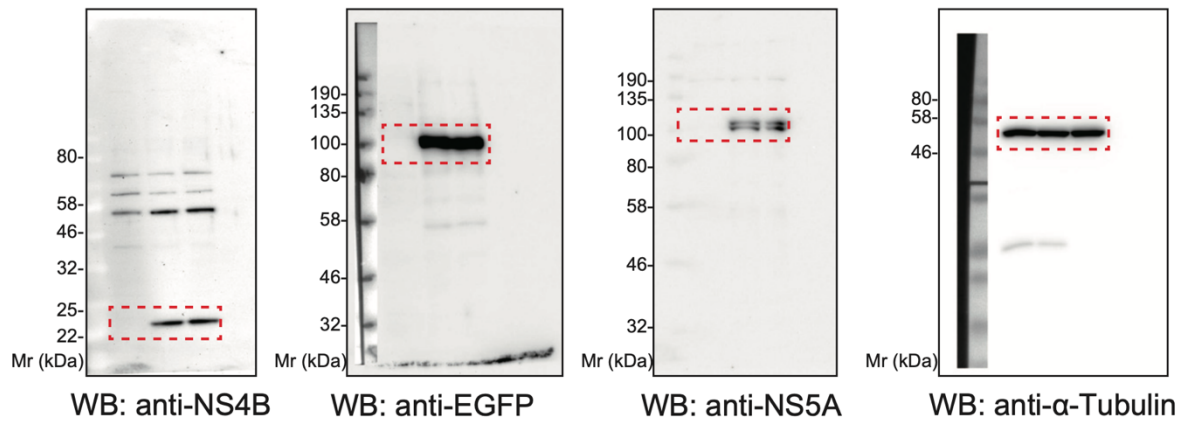

**Fig. S1a**

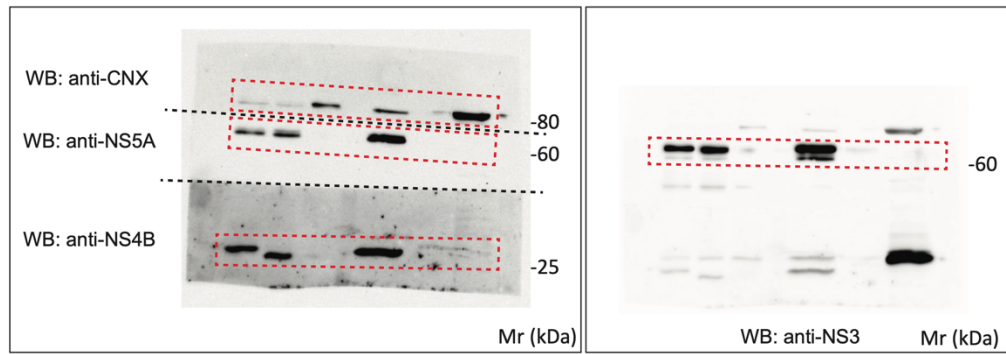

**Fig. S3a**

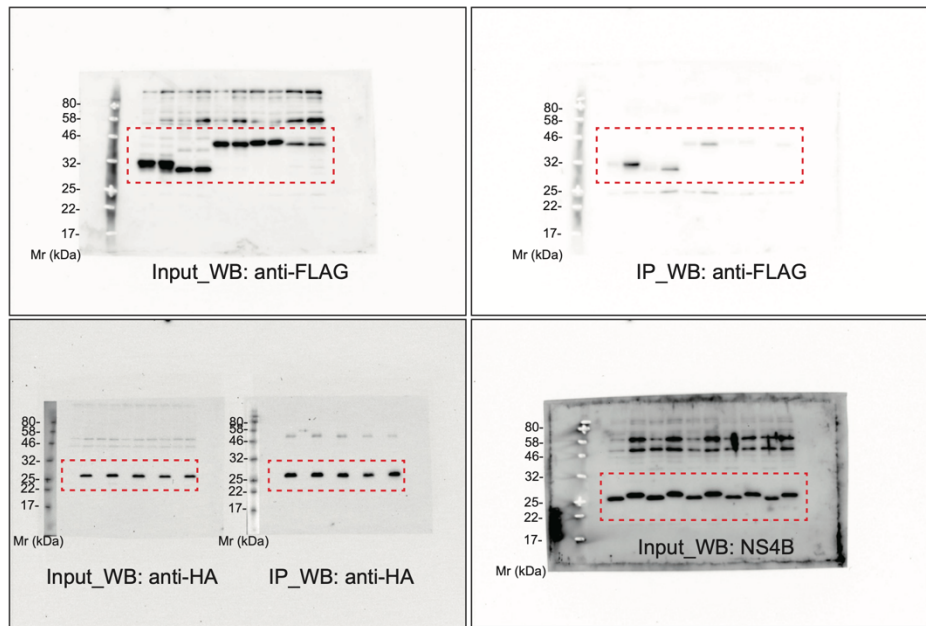

Fig. S8c

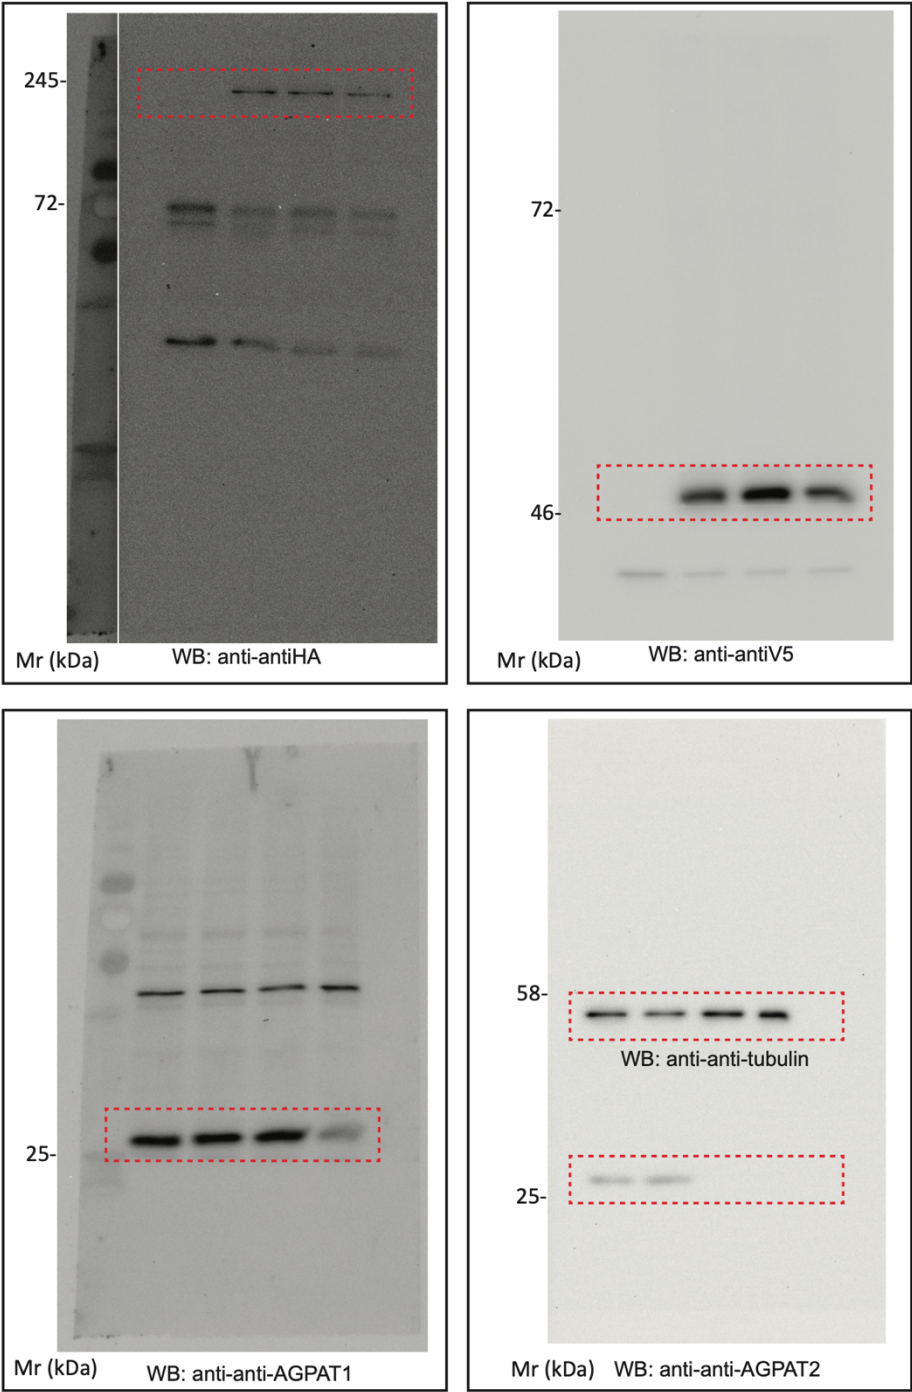

Fig. S10c

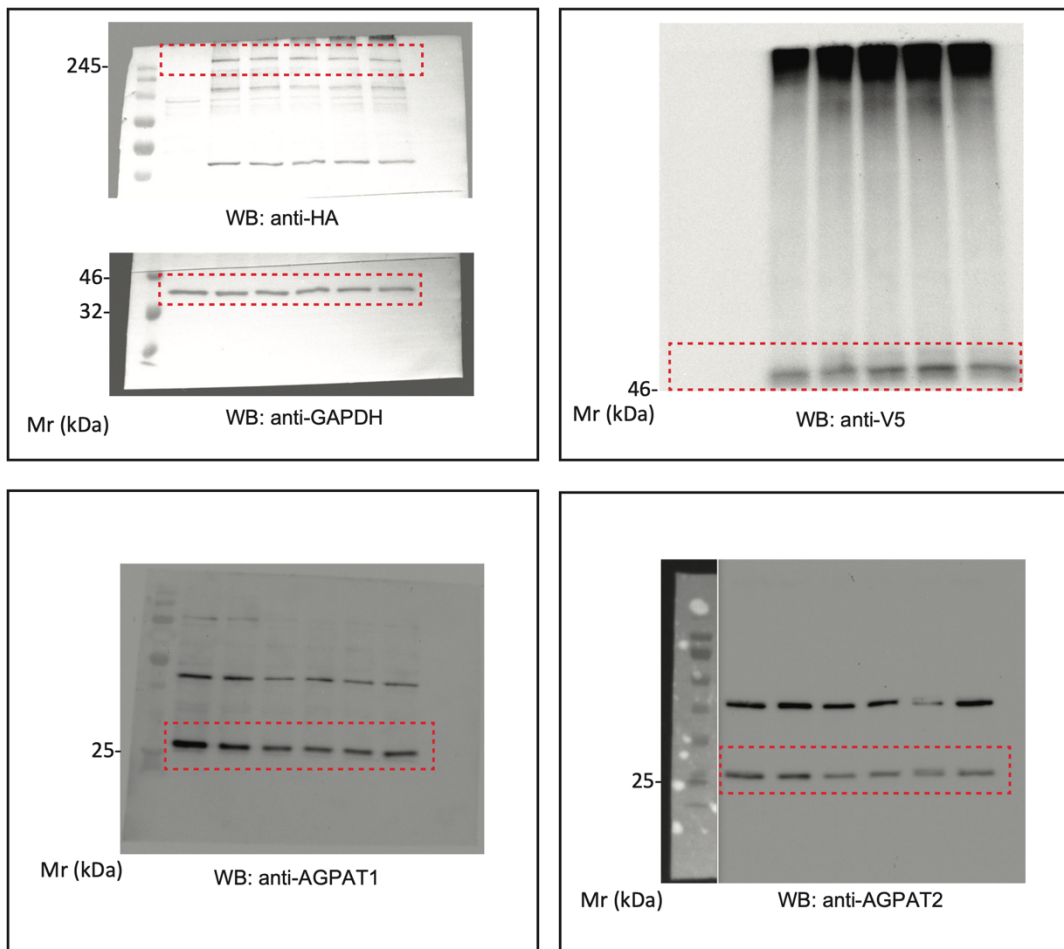

Supplement: 41467_2021_27511_MOESM1_ESM.pdf [file 41467_2021_27511_MOESM1_ESM.pdf]
